# Supplementary material
Source: Springer Nature journal article supplement (https://www.springermedizin.de/resource/supplementary/12933_2012_525_MOESM2_ESM.pdf/9538668)

**A**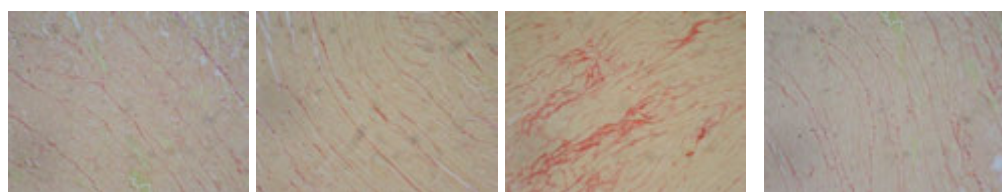

NC

NC+ALA

STZ

STZ+ALA

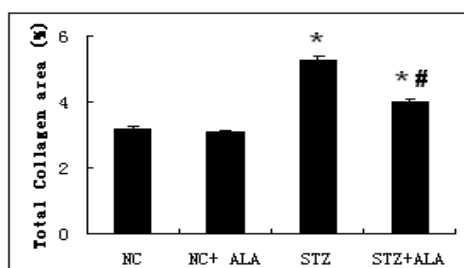**B**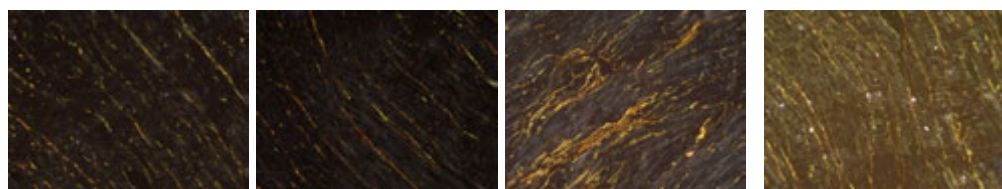

NC

NC+ALA

STZ

STZ+ALA

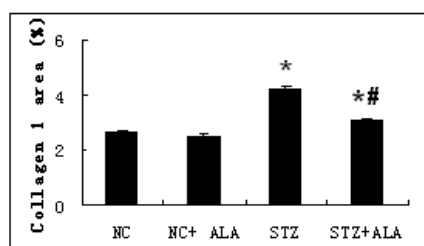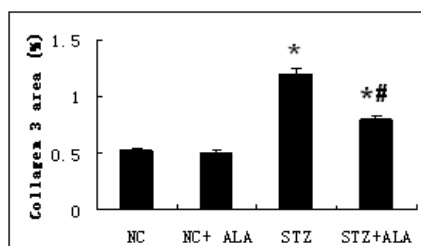**C**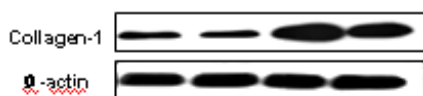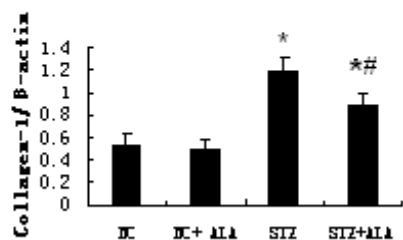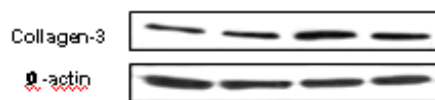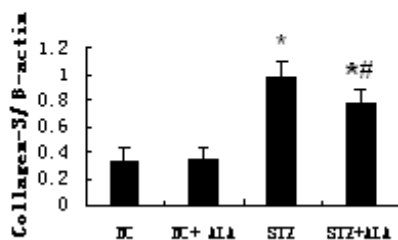

Supplement: MOESM2 [file 9538668]
